# Supplementary material
Source: HighWire-hosted journal article supplement (https://bmjopen.bmj.com/content/8/3/e018942)
Supplement: inline-supplementary-material-1 [file inline-supplementary-material-1.pdf]

**Supplementary material 1.** Details on variables and coding.

| Variable                     | Question text                                                                                                                                                                                                                                                                                                                                                                                                                                                             | Answer categories                                                                                            | Variable coding                                                                                                   |
|------------------------------|---------------------------------------------------------------------------------------------------------------------------------------------------------------------------------------------------------------------------------------------------------------------------------------------------------------------------------------------------------------------------------------------------------------------------------------------------------------------------|--------------------------------------------------------------------------------------------------------------|-------------------------------------------------------------------------------------------------------------------|
| <b>Independent variables</b> |                                                                                                                                                                                                                                                                                                                                                                                                                                                                           |                                                                                                              |                                                                                                                   |
| <b>Anxiety (HADS-A)</b>      | <p><i>What describes you feeling the last week?</i></p> <p>I get a sort of frightened feeling like ‘butterflies’ in the stomach</p> <p>Worrying thoughts go through my mind</p> <p>I can sit at ease and feel relaxed</p> <p>I get a sort of frightened feeling as if something awful is about to happen</p> <p>I feel restless as if I have to be on the move</p> <p>I get sudden feelings of panic</p> <p>In the last two weeks have you felt nervous and restless?</p> | <p>Definitely as much (0)</p> <p>Not quite so much (1)</p> <p>Only a little (2)</p> <p>Hardly at all (3)</p> | <p>Sum of anxiety variables if all 7 are answered</p> <p>0-7 = <b>no anxiety</b></p> <p>8-21 = <b>anxiety</b></p> |
| <b>Depression (HADS-D)</b>   | <p><i>What describes you feeling the last week?</i></p> <p>I still enjoy the things I used to enjoy</p>                                                                                                                                                                                                                                                                                                                                                                   | <p>Definitely as much (0)</p> <p>Not quite so much (1)</p>                                                   | <p>Sum of depression variables if all 7 are answered</p> <p>0-7 = <b>no depression</b></p>                        |

|                                 |                                                                                                                                                                                                                                                               |                                                                                                                                                                                      |                                                                                                                                                                                                      |
|---------------------------------|---------------------------------------------------------------------------------------------------------------------------------------------------------------------------------------------------------------------------------------------------------------|--------------------------------------------------------------------------------------------------------------------------------------------------------------------------------------|------------------------------------------------------------------------------------------------------------------------------------------------------------------------------------------------------|
|                                 | <p>I can laugh and see the funny side of things</p> <p>I feel cheerful</p> <p>I feel as if I'm slowed down</p> <p>I have lost interest in my appearance</p> <p>I look forward with enjoyment to things</p> <p>I can enjoy a good book or radio/TV program</p> | <p>Only a little (2)</p> <p>Hardly at all (3)</p>                                                                                                                                    | <p>8-21 = <b>depression</b></p>                                                                                                                                                                      |
| <p><b>Self-rated health</b></p> | <p>How is your health at the moment?</p>                                                                                                                                                                                                                      | <p>Poor</p> <p>Not so good</p> <p>Good</p> <p>Very good</p>                                                                                                                          | <p><b>Poor</b> = poor + not so good</p> <p><b>Good</b> = good + very good</p>                                                                                                                        |
| <p><b>Life satisfaction</b></p> | <p>Thinking about your life at the moment, would you say that you by and large are satisfied with life, or are you mostly dissatisfied?</p>                                                                                                                   | <p>Very satisfied</p> <p>Satisfied</p> <p>Somewhat satisfied</p> <p>Neither satisfied nor dissatisfied</p> <p>Somewhat dissatisfied</p> <p>Dissatisfied</p> <p>Very dissatisfied</p> | <p><b>Satisfied</b> = very satisfied + satisfied + somewhat satisfied</p> <p><b>Dissatisfied</b> = neither satisfied nor dissatisfied + somewhat dissatisfied + dissatisfied + very dissatisfied</p> |

|                       |                                                                                                                                                                                                                                                                                                                                |                                                               |                                                                                                                       |
|-----------------------|--------------------------------------------------------------------------------------------------------------------------------------------------------------------------------------------------------------------------------------------------------------------------------------------------------------------------------|---------------------------------------------------------------|-----------------------------------------------------------------------------------------------------------------------|
| <b>Daily smoker</b>   | Do you smoke?                                                                                                                                                                                                                                                                                                                  | Never smoked daily<br>Ex smoker daily<br>Current smoker daily | Corrected for answers in HUNT1 and HUNT3<br><br><b>Current smoker daily</b><br><br><b>Not current smoker daily</b>    |
| <b>Alcohol</b>        | Have you ever felt that you should reduce your alcohol intake?<br><br>Have other people ever criticised your use of alcohol?<br><br>Have you ever felt bad or guilty because of your use of alcohol?<br><br>Have you ever had a drink first thing in the morning as a pick-me-up or to calm your nerves or to cure a hangover? | No = 0<br><br>Yes = 1                                         | <b>Problematic alcohol behaviour</b> = $\geq 2$ yes<br><br><b>Not problematic alcohol behaviour</b> = $\leq 1$ yes    |
| <b>Sleep duration</b> | How many hours do you usually spend lying down during a 24-hour period?                                                                                                                                                                                                                                                        | Report number of hours                                        | <b>Short or prolonged sleeping time</b> = $\leq 6$ or $\geq 10$ hours<br><br><b>Normal sleeping hours</b> = 7-9 hours |
| <b>Sitting time</b>   | How many hours do you usually spend sitting down                                                                                                                                                                                                                                                                               | Report number of hours                                        | <b>Prolonged sitting time</b> = $\geq 8$ hours                                                                        |

|                             |                                                                                                                                                                                                                          |                                                                                                      |                                                                                                                                                                                                          |
|-----------------------------|--------------------------------------------------------------------------------------------------------------------------------------------------------------------------------------------------------------------------|------------------------------------------------------------------------------------------------------|----------------------------------------------------------------------------------------------------------------------------------------------------------------------------------------------------------|
|                             | during a 24 hour period?                                                                                                                                                                                                 |                                                                                                      | <b>Normal sitting time</b><br>= $\leq 7$ hours                                                                                                                                                           |
| <b>Social participation</b> | How often do you usually participate in social activities such as a sewing club, athletic club, political association, religious or other groups?                                                                        | Never, or only a few times a year<br>1-2 times a month<br>About once a week<br>More than once a week | <b>Never or seldom socially active</b> = never, or only a few times a year<br><br><b>Socially active</b> = 1-2 times a month + about once a week + more than once a week                                 |
| <b>Physical activity</b>    | Average of hours of low physical activity per week in the last year (not panting for breath or sweating)?<br><br>Average hours of vigorous physical activity per week in the last year (panting for breath or sweating)? | None<br>Less than 1 hour<br>1-2 hours<br>3 hours or more                                             | <b>Physically inactive</b> = $\leq 3$ hours light & no hard physical activity per week<br><br><b>Physically active</b> = 3 hours or more light physical activity or $\geq 1$ hour hard physical activity |
| <b>Adjustment variables</b> |                                                                                                                                                                                                                          |                                                                                                      |                                                                                                                                                                                                          |
| <b>Gender</b>               | Register                                                                                                                                                                                                                 | Man<br>Woman                                                                                         | <b>Man</b><br><b>Woman</b>                                                                                                                                                                               |
| <b>Education</b>            | Register                                                                                                                                                                                                                 |                                                                                                      | <b>Primary</b> (10 years)<br><b>Secondary</b> (13 years)<br><b>Tertiary</b> (higher)                                                                                                                     |

|                                               |                                                                                                                                                                                    |                                                                                      |                                                                                                              |
|-----------------------------------------------|------------------------------------------------------------------------------------------------------------------------------------------------------------------------------------|--------------------------------------------------------------------------------------|--------------------------------------------------------------------------------------------------------------|
|                                               |                                                                                                                                                                                    |                                                                                      | education)                                                                                                   |
| <b>Age</b>                                    | Registered at participation                                                                                                                                                        | Age in whole years                                                                   | <b>60-69 years in HUNT2</b>                                                                                  |
| <b>Martial status</b>                         | National registry, Norway                                                                                                                                                          | Unmarried<br>Married<br>Widow/widower<br>Divorced<br>Separated<br>Registered partner | <b>Married</b><br><b>Unmarried = all else</b>                                                                |
| <b>Chronic illness</b>                        | Do you suffer from any long-term illness or injury of a physical or psychological nature that impairs your functioning in your everyday life? (Long-term means at least one year.) | No<br>Yes                                                                            | <b>No</b><br><b>Yes</b>                                                                                      |
| <b>Outcome variables</b>                      |                                                                                                                                                                                    |                                                                                      |                                                                                                              |
| <b>Basic Activities of Daily Living (ADL)</b> | <i>Can you manage, without the help of others, in everyday life</i><br>Walk around indoors on the same floor<br>Go to the toilet<br>Wash yourself                                  | No<br>Yes                                                                            | Sum of all no's<br><b>ADL disability = <math>\geq 1</math></b><br>no<br><b>ADL independent =</b><br>all else |

|                                                       |                                                                                                                                                                                                                                                                                                                                                  |                                           |                                                                                                                         |
|-------------------------------------------------------|--------------------------------------------------------------------------------------------------------------------------------------------------------------------------------------------------------------------------------------------------------------------------------------------------------------------------------------------------|-------------------------------------------|-------------------------------------------------------------------------------------------------------------------------|
|                                                       | <p>Take a bath or shower</p> <p>Dress and undress yourself</p> <p>Go to bed and get up</p> <p>Eat</p>                                                                                                                                                                                                                                            |                                           |                                                                                                                         |
| <b>Instrumental Activities of Daily Living (IADL)</b> | <p><i>Can you manage, without the help of others, in everyday life</i></p> <p>Prepare warm meals</p> <p>Do light housework (ex: wash dishes)</p> <p>Do heavier housework (ex: wash floors)</p> <p>Do heavier housework (ex: wash floors)</p> <p>Do the shopping</p> <p>Pay bills</p> <p>Take the medicines</p> <p>Go out</p> <p>Take the bus</p> | <p>No</p> <p>Yes</p>                      | <p>Sum of all no's</p> <p><b>IADL disability</b> = <math>\geq</math> 1 no</p> <p><b>IADL independent</b> = all else</p> |
| <b>Mortality</b>                                      | <p>Current status in national records</p>                                                                                                                                                                                                                                                                                                        | <p>Died</p> <p>Emigrated</p> <p>Alive</p> | <p>Participated in HUNT2 (1995-97) and died before the start of HUNT3 (October 2006)</p>                                |
| <b>Non-participation</b>                              | <p>Not participated in HUNT3</p>                                                                                                                                                                                                                                                                                                                 | <p>Participated</p>                       | <p>Participated in HUNT2 but not in</p>                                                                                 |

|                 |  |                              |       |
|-----------------|--|------------------------------|-------|
| <b>in HUNT3</b> |  | Invited, not<br>participated | HUNT3 |
|-----------------|--|------------------------------|-------|
